# Supplementary material for: Surface chemistry in calcium capped carbon quantum dots
Source: Royal Society of Chemistry journal article supplement (doi:10.1039/d1nr02763h), 2021-01-01
Supplement: d1nr02763h1.pdf [file d1nr02763h1.pdf]

## Supporting Information

### Surface Chemistry in Calcium Capped Carbon Quantum Dots

Shihuan Ren, Bingxu Liu, Guangting Han\*, Haiguang Zhao\*, Yuanming Zhang\*

S.H. Ren, B.X. Liu

College of Textiles & Clothing, Qingdao University, No. 308 Ningxia Road, Qingdao 266071,

P. R. China

Dr. G. T. Han, Dr. H. G. Zhao, Dr. Y. M. Zhang

State Key Laboratory of Bio-Fibers and Eco-Textiles, College of Physics, University-Industry

Joint Center for Ocean Observation and Broadband Communication, Qingdao University,

Qingdao, 266071, China

E-mail: (kychgt@qdu.edu.cn; hgzhao@qdu.edu.cn; Zhangyuanming001@163.com)

## Supporting figures and tables

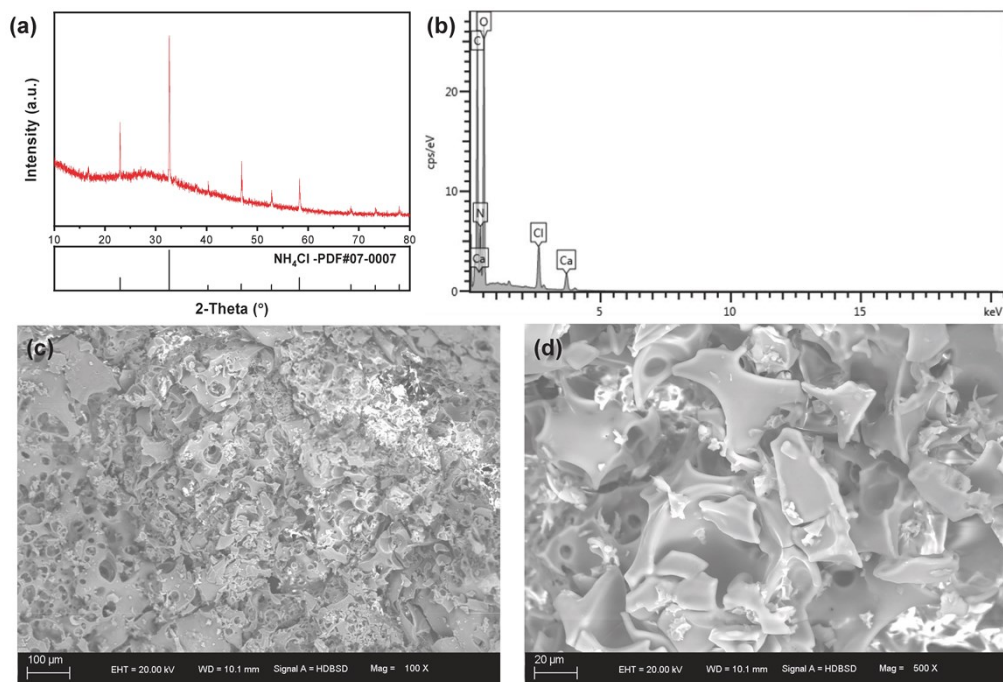

**Fig. S1** (a) XRD pattern of C-dots. The C-dots is an unpurified original product prepared by space-confined vacuum heating. EDS spectra (b) of unpurified C-dots. SEM images of the C-dots with low magnification (c) and high magnification (d). A clear mesoporous network can be found based on the SEM images.

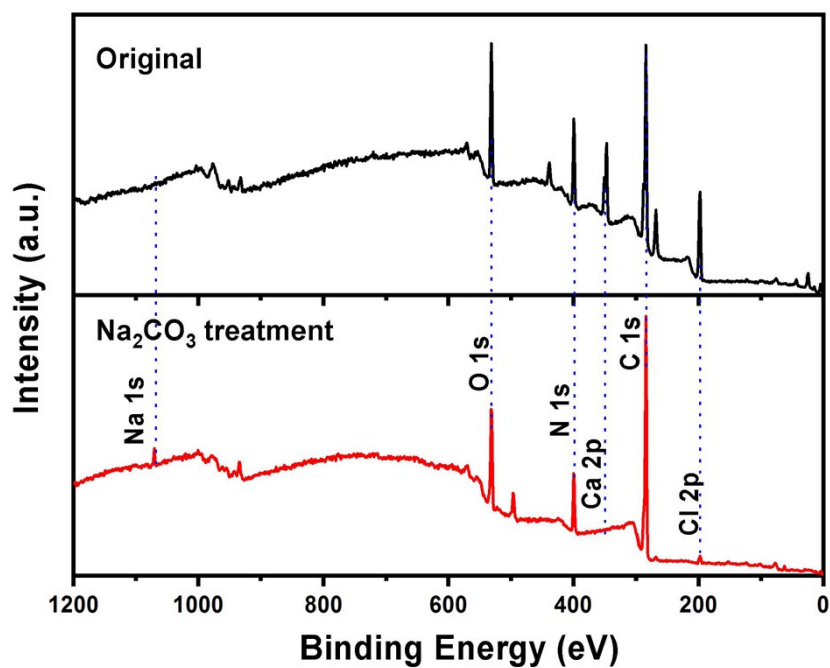

**Fig. S2** The survey XPS spectra of the C-dots before (Original) and after Na<sub>2</sub>CO<sub>3</sub>-treatment. The Ca cations disappeared after Na<sub>2</sub>CO<sub>3</sub> treatment.

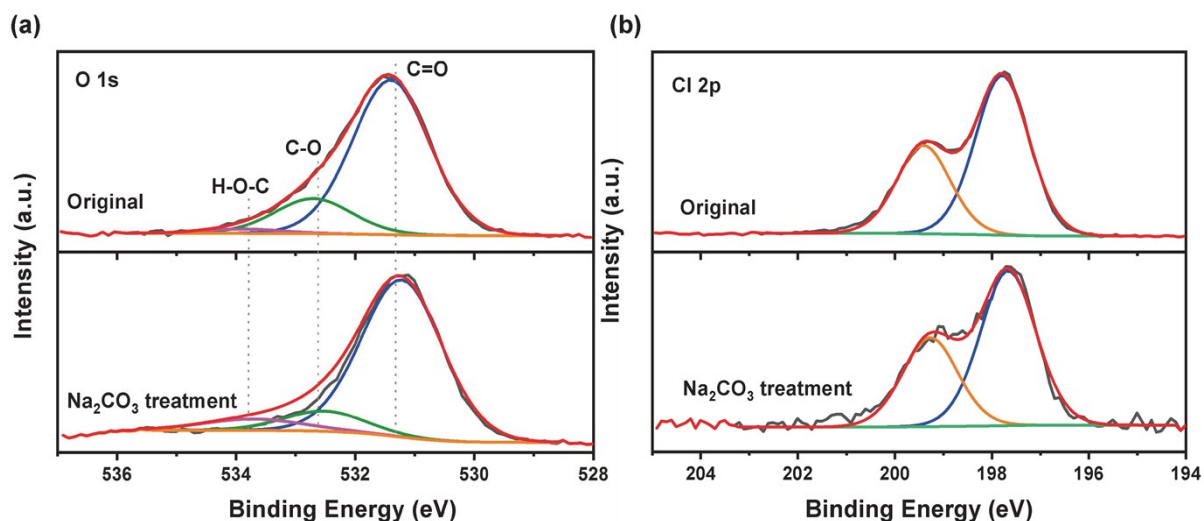

**Fig. S3** (a) High resolution XPS O 1s (a) and (b) Cl 2p spectra of the C-dots before (Original) and after Na<sub>2</sub>CO<sub>3</sub>-treatment.

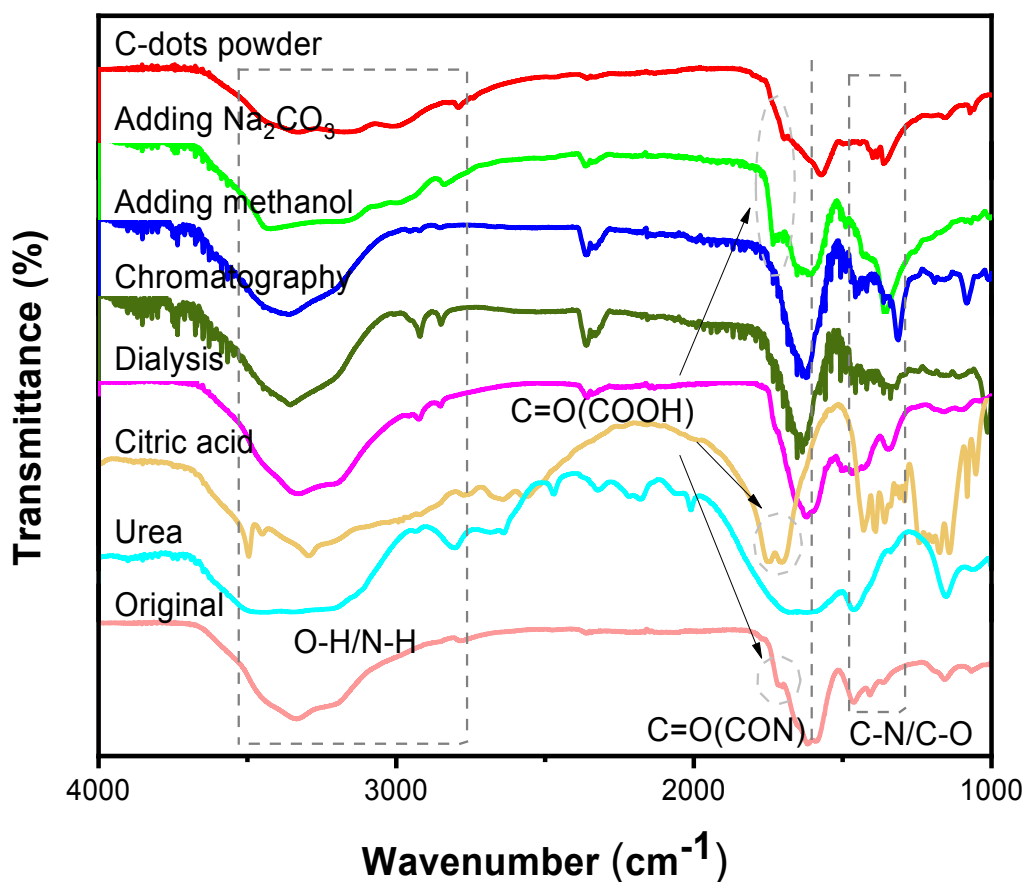

**Fig. S4** FT-IR spectra of the Na<sub>2</sub>CO<sub>3</sub>-treatment C-dots during the different purification procedures. For comparison, the Citric acid, Urea, and the “Original” C-dots (without Na<sub>2</sub>CO<sub>3</sub> treatment) were also included.

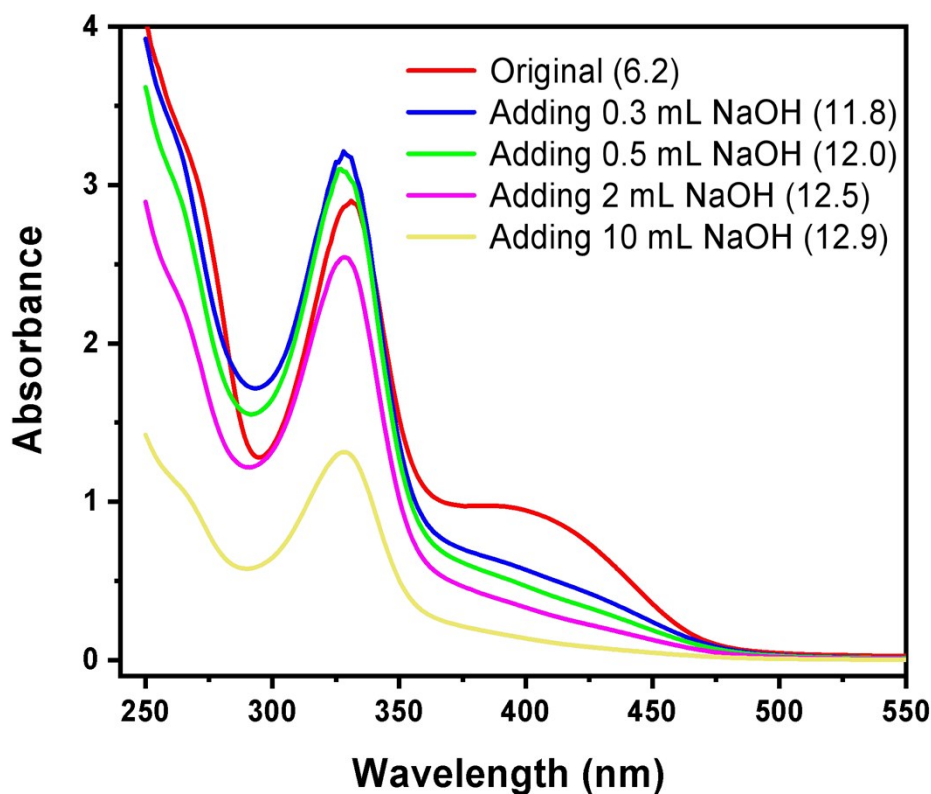

**Fig. S5** Absorption spectra of C-dots after NaOH treatment.

**Table S1.** The atomic percentage of the elements of the Original and  $\text{Na}_2\text{CO}_3$ -treatment samples. The ratios were estimated based on the XPS spectra as shown in Figure S2. The molar ratio of the Ca/Cl is close to 2, indicating that  $\text{CaCl}_2$  was presented in the Original C-dots.

| Element | Atomic percentage, Original (%) | Atomic percentage, $\text{Na}_2\text{CO}_3$ treatment (%) |
|---------|---------------------------------|-----------------------------------------------------------|
| C       | 58.9                            | 75.93                                                     |
| N       | 12.59                           | 10.54                                                     |
| O       | 12.38                           | 12.12                                                     |
| Cl      | 10.86                           | 0.95                                                      |
| Ca      | 5.44                            | 0                                                         |
| Na      | 0                               | 0.46                                                      |

**Table S2.** Molar percentage of different carbon components under different treatment conditions.

| Component | Molar percentage of Original (%) | Molar percentage of $\text{Na}_2\text{CO}_3$ treatment (%) |
|-----------|----------------------------------|------------------------------------------------------------|
| C=C/C-C   | 62.69                            | 72.68                                                      |
| C-N       | 12.81                            | 11.55                                                      |

|             |       |      |
|-------------|-------|------|
| <b>C-O</b>  | 4.81  | 7.41 |
| <b>-C=O</b> | 19.69 | 8.36 |

**Table S3.** Molar percentage of different nitrogen composition under different treatment conditions.

| <b>Component</b>   | <b>Molar percentage of Original (%)</b> | <b>Molar percentage of Na<sub>2</sub>CO<sub>3</sub> treatment (%)</b> |
|--------------------|-----------------------------------------|-----------------------------------------------------------------------|
| <b>Pyridinic N</b> | 89.76                                   | 95.94                                                                 |
| <b>NH groups</b>   | 10.24                                   | 4.06                                                                  |

**Table S4.** Mass evolution of the C-dots product during the purification process. **Stage I** : 1 g of C-dots was treated with 2.6 g (excess) of Na<sub>2</sub>CO<sub>3</sub> aqueous solution after precipitation by ethanol; **Stage II** : gel chromatography; **Stage III**: dialysis (dialysis tube, 500 Da). The powder was obtained by using 0.33g citric acid, 0.66g urea and 0.33 g CaCl<sub>2</sub>.

| <b>Purification</b>        | <b>Stage I</b> | <b>Stage II</b> | <b>Stage III</b> |
|----------------------------|----------------|-----------------|------------------|
| <b>Obtained powder (g)</b> | 2.57           | 2.4             | 0.3              |
